# Supplementary material for: Enhanced near-infrared luminescence in Ln2Cd2 (Ln = Nd, Yb) heterotetranuclear complexes
Source: Royal Society of Chemistry journal article supplement (doi:10.1039/d0ce00341g), 2020-01-01
Supplement: d0ce00341g1.pdf [file d0ce00341g1.pdf]

## Supplementary Information

### Enhanced near-infrared luminescence in Ln<sub>2</sub>Cd<sub>2</sub> (Ln = Nd, Yb) heterotetranuclear complexes

Yue Qi, Ou Sun, Yanyan Zhou, Yuan Yao, Zhenyu Cheng, Ting Gao\* and Hongfeng Li\*

Key Laboratory of Functional Inorganic Material Chemistry, Ministry of Education, P. R. China;  
School of Chemistry and Materials Science, Heilongjiang University, Harbin 150080, P. R. China.

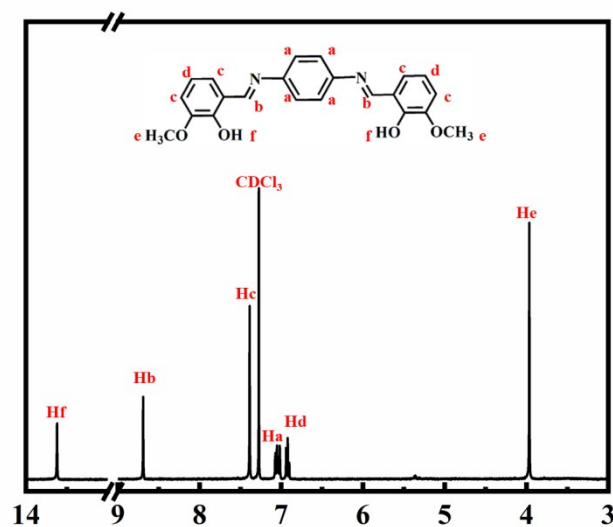

Fig. S1. <sup>1</sup>H NMR spectrum of H<sub>2</sub>L in CDCl<sub>3</sub>.

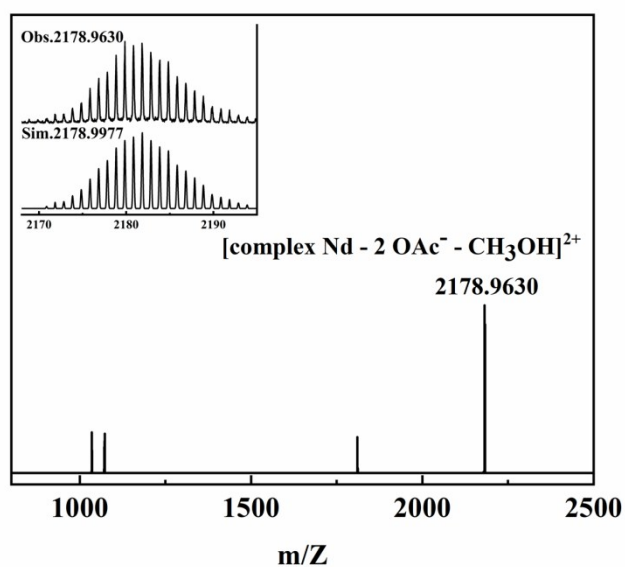

Fig. S2. ESI-TOF-MS of complex 1.

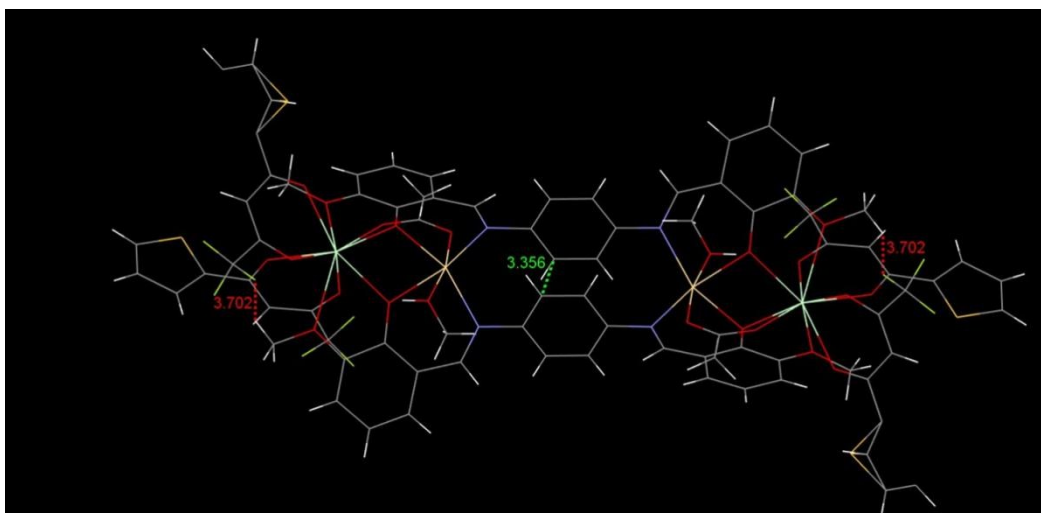

**Fig. S3.** The intramolecular C-H...F interactions between the F atoms of TTA and H atoms of L and  $\pi - \pi$  conjugate effect for complex 2.

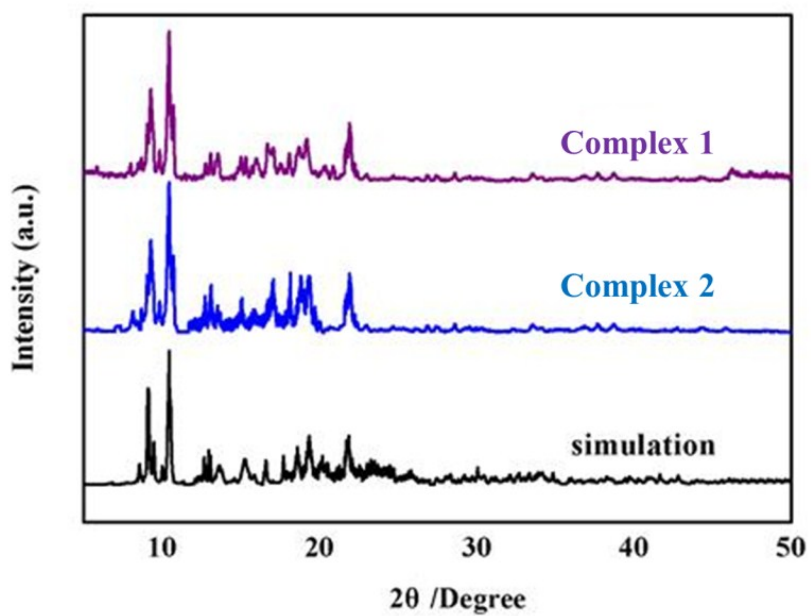

**Fig. S4.** The powder X-ray diffraction (PXRD) patterns of complexes 1 and 2

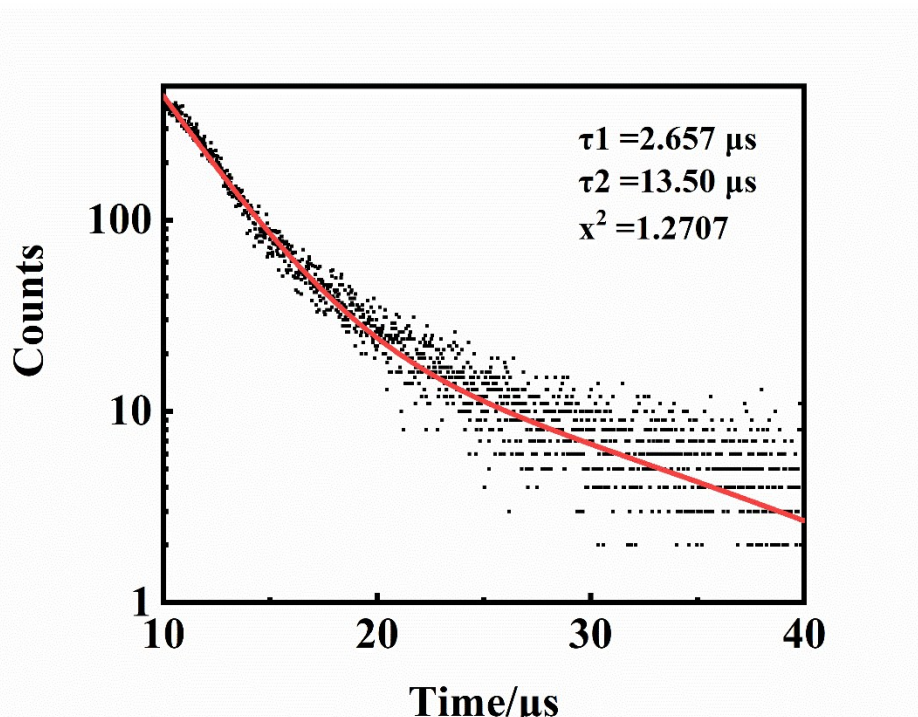

Fig. S5 Luminescence decay curves of **1** in  $\text{CH}_3\text{CN}$ .

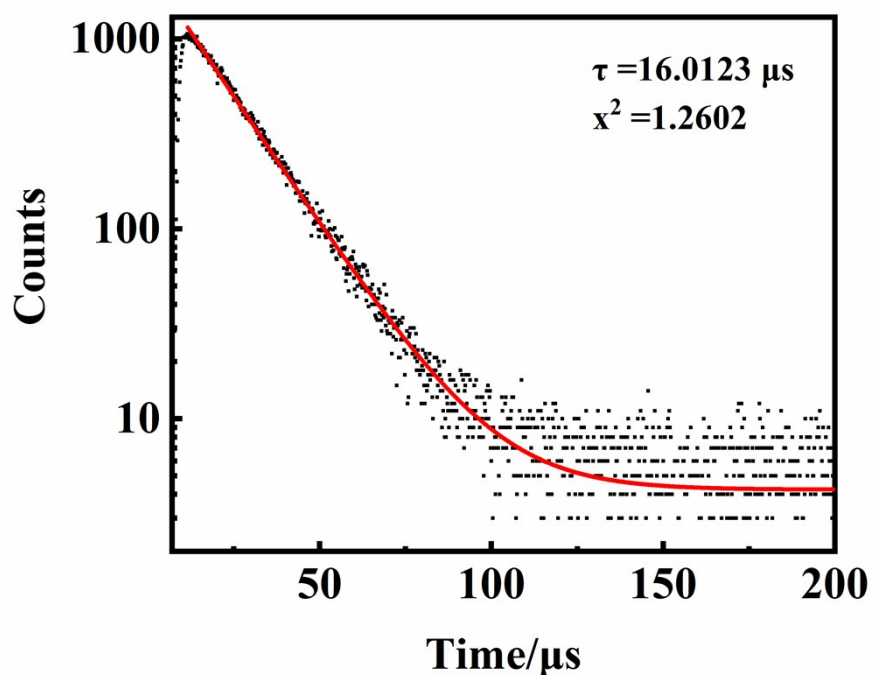

Fig. S6. Luminescence decay curves of **2** in  $\text{CH}_3\text{CN}$ .

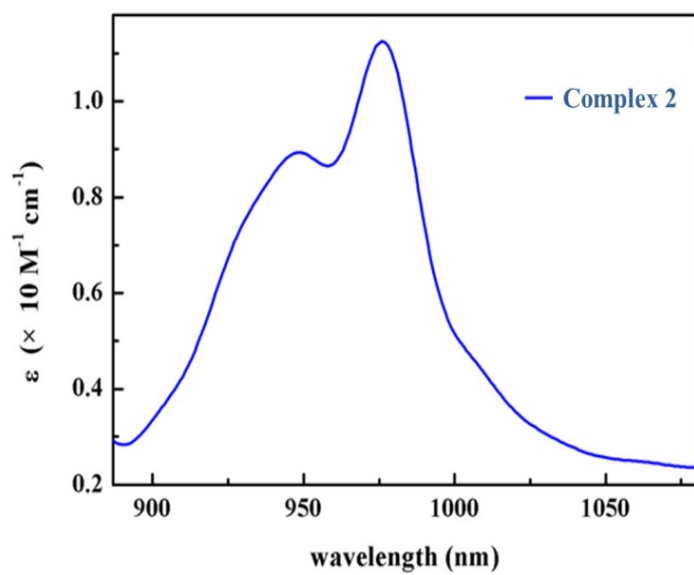

Fig. S7. Near-infrared spectrum of f–f absorption transition for **2** in  $\text{CH}_3\text{CN}$ .

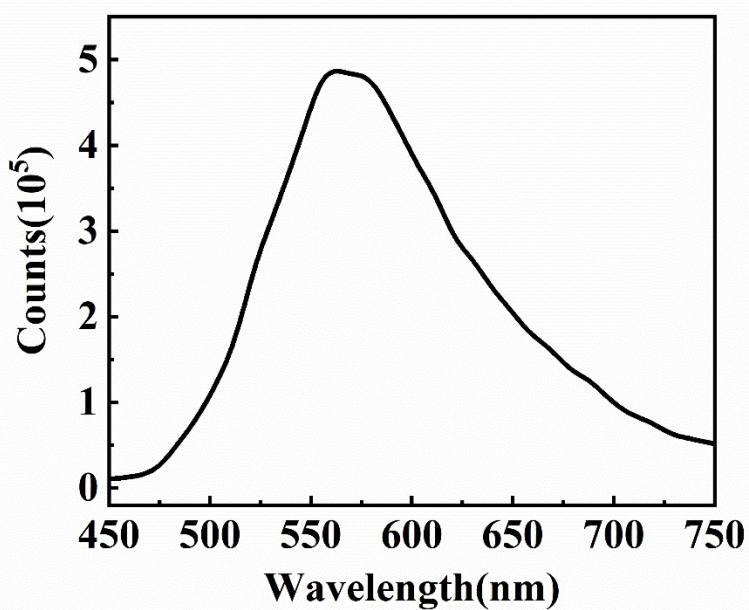

Fig. S8. Emission spectrum of  $\text{Gd}_2\text{L}_2$  in  $\text{CH}_3\text{CN}$  at 77 K.

**Table S1.** Some absolute quantum yields of related literatures.

| References | Complex              | $\Phi_{em}$ (%) |
|------------|----------------------|-----------------|
| This text  | Yb <sup>3+</sup>     | 2.13            |
|            | Nd <sup>3+</sup>     | 0.34            |
| 16(a)      | Yb <sup>3+</sup>     | 0.04            |
| 16(b)      | Nd <sup>3+</sup> (1) | 0.17            |
|            | Nd <sup>3+</sup> (2) | 0.46            |
| 16(c)      | Yb <sup>3+</sup>     | 1.07            |
|            | Nd <sup>3+</sup>     | 0.36            |
| 16(d)      | Nd <sup>3+</sup>     | 0.56            |
|            | Yb <sup>3+</sup>     | 1.32            |
| 16(e)      | Nd <sup>3+</sup> (1) | 0.45            |
|            | Nd <sup>3+</sup> (2) | 1.07            |
|            | Yb <sup>3+</sup> (1) | 1.69            |
|            | Yb <sup>3+</sup> (2) | 3.08            |
| 16(f)      | Nd <sup>3+</sup>     | 0.62            |
|            | Yb <sup>3+</sup>     | 0.79            |
| 16(g)      | Yb <sup>3+</sup>     | 0.41            |

**Table S2.** Crystallographic data for **1**.

| Complex           | <b>1</b>                                                                                                                                      |
|-------------------|-----------------------------------------------------------------------------------------------------------------------------------------------|
| CCDC number       | 1977217                                                                                                                                       |
| Empirical formula | C <sub>86</sub> H <sub>74</sub> N <sub>4</sub> O <sub>22</sub> F <sub>12</sub> S <sub>4</sub> Cl <sub>8</sub> Nd <sub>2</sub> Cd <sub>2</sub> |
| Formula weight    | 2668.61                                                                                                                                       |
| Temperature (K)   | 100                                                                                                                                           |
| Crystal system    | triclinic                                                                                                                                     |
| Space group       | P-1                                                                                                                                           |
| <i>a</i> (Å)      | 10.7102(8)                                                                                                                                    |
| <i>b</i> (Å)      | 12.4241(9)                                                                                                                                    |
| <i>c</i> (Å)      | 18.9297(14)                                                                                                                                   |
| $\alpha$ (°)      | 88.674(2)                                                                                                                                     |
| $\beta$ (°)       | 81.057(3)                                                                                                                                     |
| $\gamma$ (°)      | 77.969(2)                                                                                                                                     |

|                                           |                        |
|-------------------------------------------|------------------------|
| $V$ (Å <sup>3</sup> )                     | 2433.5(3)              |
| $Z$                                       | 1                      |
| $\rho_{\text{calc}}$ /cm <sup>-3</sup>    | 1.821                  |
| $\mu$ (mm <sup>-1</sup> )                 | 1.880                  |
| $F(000)$                                  | 1318.0                 |
| $\theta$ range                            | 5.84 to 56.58          |
| Index ranges                              | -14 $\leq$ h $\leq$ 14 |
|                                           | -16 $\leq$ k $\leq$ 16 |
|                                           | -25 $\leq$ l $\leq$ 25 |
| Reflections collected                     | 127756                 |
| Completeness to theta =                   | 99.3%                  |
| Data/restraints/parameters                | 12059/207/658          |
| Goodness-of-fit on $F^2$                  | 1.070                  |
| Final $R$ indexes [ $I \geq 2\sigma(I)$ ] | $R_1 = 0.0516$         |
|                                           | $wR_2 = 0.1321$        |
| Final $R$ indexes [all data]              | $R_1 = 0.0543$         |
|                                           | $wR_2 = 0.1346$        |

**Table S3.** Purity and producing factory of reagents

| Reagents and chemicals           | Purity          | Manufacturer                                       |
|----------------------------------|-----------------|----------------------------------------------------|
| CH <sub>3</sub> OH               | Analytical pure | Tianjin Kemiou Chemical Reagent Development Center |
| CH <sub>3</sub> CN               | $\geq 99.5\%$   | Tianjin Kemiou Chemical Reagent Development Center |
| CH <sub>2</sub> Cl <sub>2</sub>  | $\geq 99.5\%$   | Tianjin Kemiou Chemical Reagent Development Center |
| Cd(OAc) <sub>2</sub>             | 99.9%           | Shanghai Yuelong Chemical Co., Ltd.                |
| NaOH                             | 99.9%           | Shanghai Yuelong Chemical Co., Ltd.                |
| 2-Hydroxy-3-methoxy-benzaldehyde | 98%             | Aladdin Chemical Reagent Co., Ltd.                 |
| 2-thenoyltrifluoroacetone        | 98%             | Aladdin Chemical Reagent Co., Ltd.                 |
| p-phenylenediamine               | 98%             | Aladdin Chemical Reagent Co., Ltd.                 |
